# Supplementary material for: Comparative RNA-Seq Analysis Reveals That Regulatory Network of Maize Root Development Controls the Expression of Genes in Response to N Stress
Source: PubMed Central journal article supplement (PMC4798287; doi:10.1371/journal.pone.0151697), 2016-03-18

# Biological processes

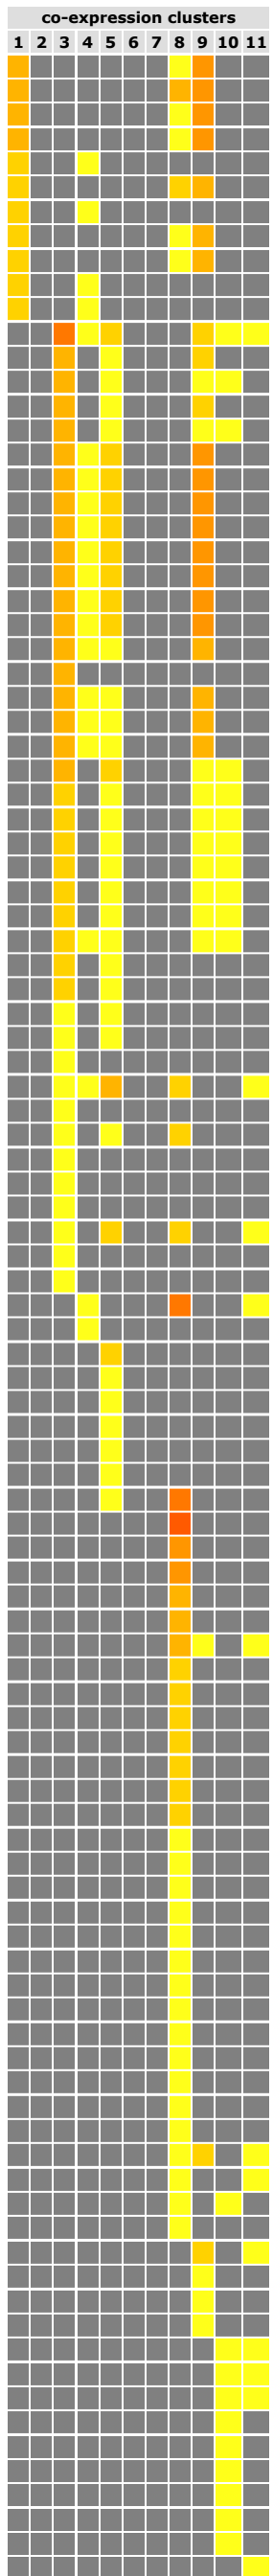

# Molecular functions

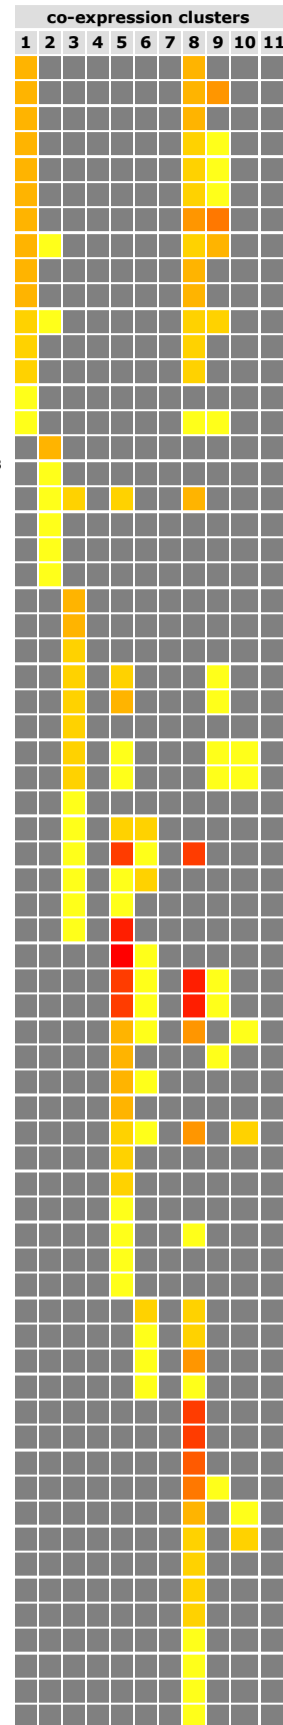

# Cellular components

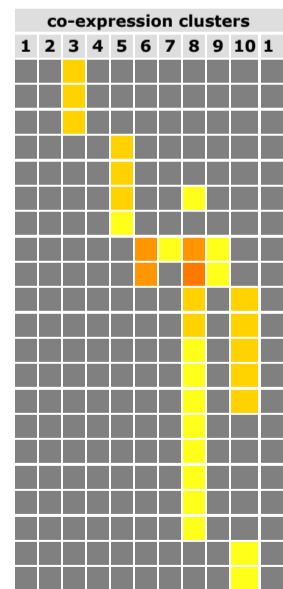

Supplement: pone.0151697.s003.pdf [file pone.0151697.s003.pdf]
